# Supplementary material for: Pseudoprogression in Immunotherapy and Identification of Clinical-Biologic Predictive Factors: A Retrospective Pan-Tumor Cohort Study
Source: Research Square preprint supplement (doi:10.21203/rs.3.rs-7765256/v1), 2025-10-17
Supplement: Supplementary file 1 [file c6d794812ca72148faf10200.docx]

**Supplemental tables**

| Baseline characteristics |  | Overall cohort  N = 123 | Pseudo-progression  N = 56 (46%) | Progression disease  N = 67 (54%) |
| --- | --- | --- | --- | --- |
| Albumin | median (range) | 40 (25.2-46.8) | 40 (26-46.8) | 40.4 (25.2-46) |
|  | Na | n=53 | n=27 | n=26 |
| Hemoglobin | median (range) | 12.5 (8.1-16.1) | 12.5 (8.5-15.6) | 12.4 (8.1-16.1) |
|  | Na | n=17 | n=7 | n=10 |
| Neutrophils | median (range) | 4460 (1410-16200) | 4554.5 (2090-16200) | 3843 (1410-15790) |
|  | Na | n=20 | n=8 | n=12 |
| LDH | median (range) | 205 (124-1095) | 200.2 (135-723) | 206 (124-1095) |
|  | Na | n=37 | n=17 | n=20 |
| Calcemia | median (range) | 2.4 (2.1-2.9) | 2.4 (2.1-2.7) | 2.4 (2.2-2.9) |
|  | Na | n=52 | n=26 | n=26 |

*Table S1: Baseline biological characteristics*

*Abbreviations: LDH,* *lactate dehydrogenase; Na, unknown*

| Characteristics at t2 |  | Overall cohort  N = 123 | Pseudoprogression  N = 56 (46%) | Progression disease  N = 67 (54%) |
| --- | --- | --- | --- | --- |
| ECOG*** | 0 | 29 (25%) | 16 (29%) | 13 (21%) |
|  | 1 | 59 (50%) | 35 (64%) | 24 (38%) |
|  | 2 | 19 (16%) | 4 (7%) | 15 (24%) |
|  | 3 | 9 (7%) | - | 9 (14%) |
|  | 4 | 2 (2%) | - | 2 (3%) |
| Time between PP evocation  and first scan reevaluation | median (range) | 66 (47-86) | 63 (49-86) | 66 (42-86) |
|  | Na | n=2 | n=1 | n=1 |
| Weight | median (range) | 69.5 (38-117) | 67.5 (38-117) | 70.5 (38-111) |
|  | Na | n=11 | n=6 | n=5 |
| Relative weight  variation from t1*** | median (range) | -0.9 (-17.4 + 14.9) | 0 (-14.7-15) | -1.6 (-15.3 -14.9) |
|  | Na | n=13 | n=6 | n=7 |
| Albumin | median (range) | 39 (16-47.5) | 41 (16-47.5) | 38 (19-46.7) |
|  | Na | n=52 | n=25 | n=27 |
| Relative albumin  variation from t1* | median (range) | 0.0 (-28.1 +19.4) | 2.5 (-5.4 +19.4) | -0.7 (-28 +12.1) |
|  | Na | n=63 | n=29 | n=34 |
| Hemoglobin* | median (range) | 12.9 (7.1-17) | 13.2 (9.1-16.6) | 12.1 (7.1-17) |
|  | Na | n=21 | n=10 | n=11 |
| Relative hemoglobin  variation from t1* | median (range) | 0.7 (-35.7 +22.1) | 1.6 (-7.6 +22.1) | -1.5 (-35.7 +20.5) |
|  | Na | n=25 | n=11 | n=14 |
| Neutrophils | median (range) | 4799 (1811-18290) | 4671 (2097-18170) | 5480 (1811-18290) |
|  | Na | n=22 | n=11 | n=11 |
| Relative neutrophils  variation from t1 | median (range) | 9.4 (-44.9 +206.9) | 3.0 (-43.7 +185.8) | 11.1 (-44.9 +206.9 |
|  | Na | n=27 | n=12 | n=15 |
| LDH*** | median (range) | 198 (106-1035) | 190.8 (106-437) | 254 (164-1035) |
|  | Na | n=46 | n=16 | n=30 |
| Relative LDH  variation from t1 | median (range) | 5.6 (-71.0 +93.8) | -2.6 (-50.4 +51.6) | 8.0 (-71 +93.8) |
|  | Na | n=51 | n=19 | n=32 |
| Calcemia | median (range) | 2.4 (2.2-2.8) | 2.4 (2.2-2.6) | 2.4 (2.2-2.8) |
|  | Na | n=52 | n=23 | n=29 |
| Relative Calcemia  variation from t1 | median (range) | 0.0 (-14.0 +25.7) | 0 (-10.6 +25.7) | 0.2 (-14.0 +11.5) |
|  | Na | n=59 | n=26 | n=33 |

*Table S2: Characteristics of the patient population at the final evaluation which confirmed or not PP (t2)*

*Abbreviations: ECOG, Eastern Cooperative Oncology Group; ICI, immune checkpoints inhibitors; PP, pseudoprogression; LDH,* *lactate dehydrogenase; Na, unknown*

*P values were obtained using the two-sided Mann-Whitney test (*p<0.05 ; ***p<0.001).*

|  | OR (95%CI) | Pr(>|z|) |
| --- | --- | --- |
| Female vs male | 0.74 (0.36 to 1.52) | 0.41 |
| Age at diagnosis | 0.98 (0.95 to 1.02) | 0.38 |
| Other vs lung primitive tumor location | 0.96 (0.42 to 2.19) | 0.93 |
| Anti-PDL1 or association anti-PD1+anti-CTLA4 vs anti-PD1 alone | 1.18 (0.44 to 3.17) | 0.74 |
| Line of ICI use | 1.19 (0.79 to 1.80) | 0.40 |
| Number of metastatic sites | 1.25 (0.93 to 1.69) | 0.14 |
| Bone metastasis vs no | 1.69 (0.71 to 4.04) | 0.24 |
| Liver metastasis vs no | 1.45 (0.63 to 3.33) | 0.38 |
| Lymph nodes metastasis vs no | 1.68 (0.82 to 3.45) | 0.16 |
| Lung metastasis vs no | 1.02 (0.49 to 2.11) | 0.96 |
| Brain metastasis vs no | 1.69 (0.62 to 4.57) | 0.30 |
| Skin metastasis vs no | 0.83 (0.11 to 6.10) | 0.86 |
| Adrenal metastasis vs no | 1.09 (0.38 to 3.13) | 0.88 |
| Ecog 1 vs 0 at t0 | 2.59 (1.20 to 5.59) | **0.02** |
| Ecog 2 vs 0 at t0 | 2.14 (0.54 to 8.54) | 0.28 |
| Ecog 1 vs 0 at t1 | 1.31 (0.61 to 2.84) | 0.49 |
| Ecog 2 vs 0 at t1 | 1.00 (0.22 to 4.56) | 1.00 |
| Time between first ICI perfusion and PP evocation (months) | 1.17 (0.92 to 1.49) | 0.20 |
| Relative weight variation from t0 to t1 | 1.01 (0.94 to 1.10) | 0.72 |
| Albumin at t1 (g/l) | 0.95 (0.86 to 1.04) | 0.26 |
| Relative albumin variation from t0 to t1 (%) | 0.98 (0.94 to 1.03) | 0.43 |
| Hemoglobin at t1 (g/dl) | 0.93 (0.76 to 1.13) | 0.48 |
| Relative hemoglobin variation from t0 to t1 | 0.99 (0.96 to 1.02) | 0.56 |
| Neutrophils at t1 (g/l) | 1.08 (0.94 to 1.25) | 0.26 |
| Relative neutrophils variation from to to t1 | 1.01 (1.00 to 1.02) | 0.052 |
| LDH at t1 (100 u/l) | 1.90 (1.07 to 3.37) | **0.03** |
| LDH variation ≥ 10% from t0 to t1 | 0.72 (0.56 to 0.88 | **0.005** |
| Calcemia at t1 (mmol/l) | 1.11 (0.79 to 1.56) | 0.56 |
| Relative calcemia variation from t0 to t1 | 1.04 (0.93 to 1.16) | 0.52 |
| At least one toxicity vs no toxicity | 0.46 (0.21 to 0.99) | **0.049** |

*Table S3: Logistic univariable regression with different clinical and biological variables between the initiation of the ICI (t0) and the evocation of PP (t1).*

*Abbreviations: ECOG, Eastern Cooperative Oncology Group; ICI, immune checkpoints inhibitors; PP, pseudoprogression; LDH,* *lactate dehydrogenase; vs, versus; OR = Odds Ratio, CI = Confidence Interval*
